# Supplementary material for: STAT2 is involved in the pathogenesis of psoriasis by promoting CXCL11 and CCL5 production by keratinocytes
Source: PubMed Central journal article supplement (PMC5417613; doi:10.1371/journal.pone.0176994), 2017-05-04

S4 Fig

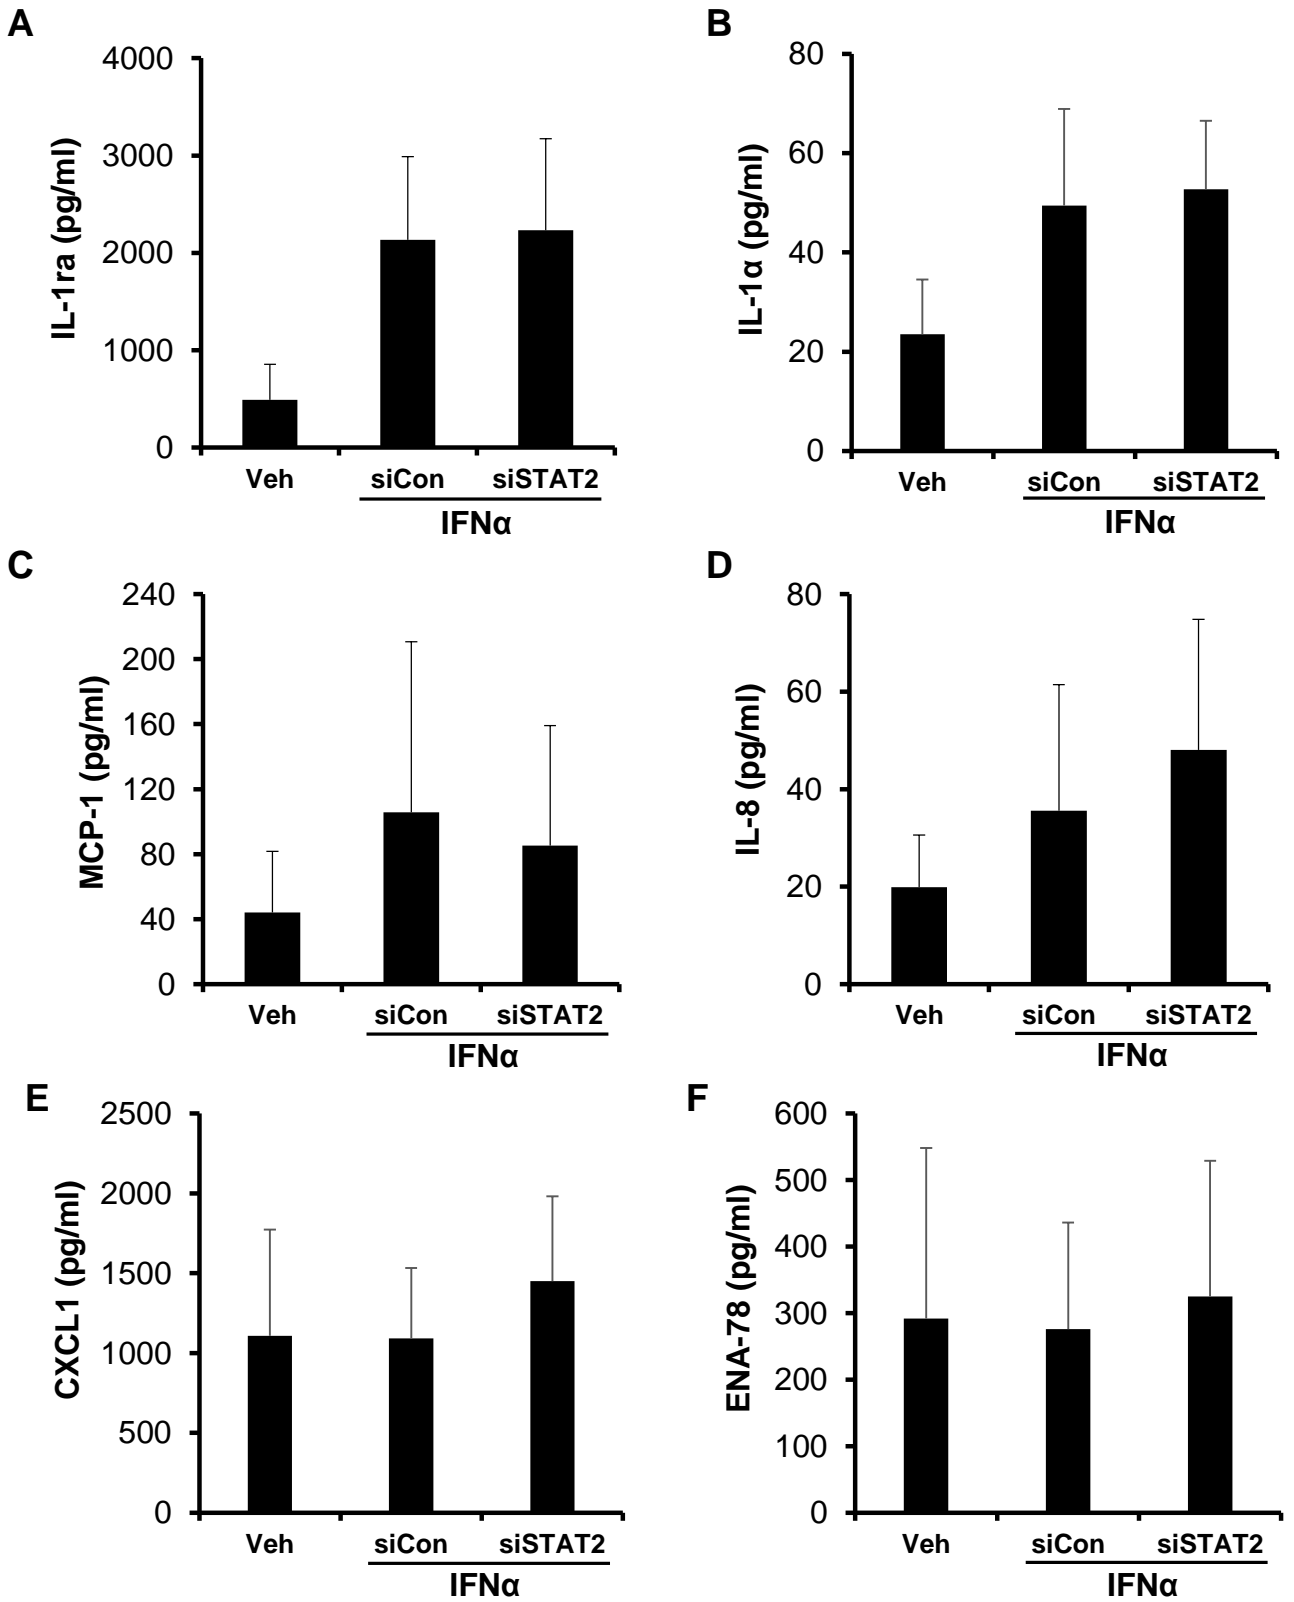

Supplement: pone.0176994.s004.pdf [file pone.0176994.s004.pdf]
